# Supplementary material for: Roflumilast Cream, 0.15%, for Atopic Dermatitis in Adults and Children: INTEGUMENT-1 and INTEGUMENT-2 Randomized Clinical Trials
Source: PubMed Central journal article supplement — JAMA Dermatol. 2024 Sep 18;160(11):1161–70. doi: 10.1001/jamadermatol.2024.3121 (PMC11411450; doi:10.1001/jamadermatol.2024.3121), 2024-09-18
Supplement: jamadermatol-e243121-s002.pdf [file jamadermatol-e243121-s002.pdf]

## Supplemental Online Content

Simpson EL, Eichenfield LF, Alonso-Llamazares J, et al. Roflumilast cream, 0.15%, for atopic dermatitis in adults and children: INTEGUMENT-1 and INTEGUMENT-2 randomized clinical trials. *JAMA Dermatol*. Published online September 18, 2024. doi:10.1001/jamadermatol.2024.3121

Investigators

eMethods

eFigure 1. Testing Hierarchy

eFigure 2. Percentage of Patients Achieving vIGA-AD 0/1

eFigure 3. LS Mean % Change from Baseline in EASI

eFigure 4. Investigator- (A, B) and Patient-Rated (C, D) Local Tolerability

eTable 1. vIGA-AD Scale

eTable 2. Patient Demographics and Baseline Characteristics

eTable 3. vIGA-AD Success at Week 4

eReferences

This supplemental material has been provided by the authors to give readers additional information about their work.

## INVESTIGATORS

### INTEGUMENT-1:

Michal Adamczyk (Lublin, Poland), Andrew Alexis (New York, NY, USA), Javier Alonso-Llamazares (Coral Gables, FL, USA), Jerry Bagel (East Windsor, NJ, USA), Neal Bhatia (San Diego, CA, USA), Andrew Blauvelt (Portland, OR, USA), Brent Boyce (Bay City, MI, USA), John Browning (San Antonio, TX, USA), Suzanne Bruce (Houston, TX, USA), Christofer Buatti (Auburn Hills, MI, USA), Michael Bukhalo (Rolling Meadow, IL, USA), Frank Calgano (Gresham, OR, USA), Lawrence Cheung (San Francisco, CA, USA), Rafal Czajkowski (Osielsko, Poland), Kenneth W. Dawes (Indianapolis, IN, USA), Marta I. Delgado (Miami Lakes, FL, USA), Navid Ezra (Thousand Oaks, CA, USA), Christina Feser (Murfreesboro, TN, USA), Seth Forman (Tampa, FL, USA), Douglass Forsha (West Jordan, UT, USA and South Jordan, UT, USA), Ellen H. Frankel (Johnston, RI, USA), Melinda Gooderham (Peterborough, ON, Canada), Shireen Guide (Rancho Santa Margarita, CA, USA), Vimal Hasumukh Prajapati (Calgary, AB, Canada), Michael Heaphy (Reno, NV, USA), Adelaide Hebert (Houston, TX, USA), Teresa Jeffers (Little Rock, AR, USA), Steven Kempers (New Brighton, MN, USA), Leon Kircik (Louisville, KY, USA), Agata Kusiba-Strażyńska (Częstochowa, Poland), Pearl C. Kwong (Jacksonville FL, USA), Megan Landis (Clarksville, IN, USA), Brenda LaTowsky (Scottsdale, AZ, USA), Aleksandra Lesiak (Łódź, Poland), Stuart Lessin (Newtown Square, PA, USA), Benjamin Lockshin (Rockville, MD, USA), Mark A. Lomaga (Mississauga, ON, Canada), Porcia Love (Montgomery, AL, USA), Charles Lynde (North Markham, ON, Canada), Wendy McFalda (Clarkston, MI, USA), Joseph Merola (Boston, MA, USA), Angela Moore (Arlington, TX, USA), Kamila Padlewska (Warszawa, Poland), Francisco Padron (Miami Shores, FL, USA), Katherine Reed (Spokane, WA, USA), Adam Reich (Rzeszów, Poland), Etienne Saint-Cyr Proulx (Montréal, QC, Canada), Eric Simpson (Portland, OR, USA), Raja Sivamani (Sacramento, CA, USA), Sarah Smiley (Medford, OR, USA), Stacy Smith (Encinitas, CA, USA), Sharleen St Surin-Lord (Largo, MD, USA), Linda Stein Gold (Detroit, MI, USA), Stephen Stipling (Summerville, SC, USA), David Stoll (Beverly Hills, CA, USA), Tory Patrick Sullivan (North Miami Beach, FL, USA), Craig Teller (Bellaire, TX, USA), Darryl Paul Toth (Windsor, ON, Canada), Irina Turchin (Fredericton, NB, Canada), Katarzyna Turel-Urasinska (Szczecin, Poland), Andleeb, Usmani (Wellington, FL, USA), Gabrielle Virgo (Silver Spring, MD, USA), Paul Wallace (Los Angeles, CA, USA), Jamie Weisman (Sandy Springs, GA, USA), Matthew Zook (Largo, FL, USA and Saint Petersburg, FL, USA)

INTEGUMENT-2:

David Neal Adam (Ajax, ON, Canada), Lorne Albrecht (Surrey, BC, Canada), Hubert Arasiewicz (Katowice, Poland), Wojciech Baran (Wrocław, Poland), Kirk Barber (Calgary, AB, Canada), Leszek Bartoszak (Poznań, Poland), Wayne Carey (Montréal QC, Canada), Daniel Carrasco (Dripping Springs, TX, USA), Nestor Cisneros (Winnipeg, MB, Canada), Jeffrey Crowley (Bakersfield, CA, USA), Artur Czaplewski (Bydgoszcz, Poland), Tadeusz Dębniak (Szczecin, Poland), Isabelle Delorme (Drummondville, QC, Canada), Zoe Draelos (High Point, NC, USA), Janet C. DuBois (Austin, TX, USA), Anton Duke (Bryant, AR, USA), Lawrence Eichenfield (San Diego, CA, USA), Laura K. Ferris (Pittsburgh, PA, USA), Rion J. Forconi (Sanford, FL, USA), Edyta Gębska (Chorzów, Poland), Fred Ghali (Grapevine, TX, USA), Marcia Glenn (Inglewood, CA, USA), Brad P. Glick (Margate, FL, USA), Michael H. Gold (Nashville, TN, USA), Mercedes E. Gonzalez (Coral Gables, FL, USA), Kimberly Grande (Knoxville, TN, USA), Lawrence J. Green (Rockville, MD, USA), Vlada Groysman (Birmingham, AL, USA), Scott T. Guenther (Plainfield, IN, USA), Fasahat Hamzavi (Fort Gratiot, MI, USA), Sameh Hannah (Toronto, ON, Canada), Nicole Harrell (Baton Rouge, LA, USA), Beata Imko-Walczuk (Gdańsk, Poland), Jeanette Jakus (Brooklyn, NY, USA), Joanna Jerzyńska (Łódź, Poland, USA), Sandra Johnson (Fort Smith, AR, USA), Anna Kacalak-Rzepka (Nowa Sól, Poland), Małgorzata Kalicka-Dudzik (Bochnia, Poland), Robert Koppel (Metairie, LA, USA), Barry Kuttner (West Palm Beach, FL, USA), Bartłomiej Kwiek (Warszawa, Poland), Edward Lain (Pflugerville, TX, USA), Mark Lee (San Antonio, TX, USA), Wei Jing Loo (London, ON, Canada), James Macdonald (West Orem, UT, USA), Isaac Melamed (Centennial, CO, USA), Elżbieta Meszyńska (Katowice, Poland), Ali Moiiin (Troy, MI, USA), Walter Nahm (San Diego, CA, USA), Magdalena Nastalek (Kraków, Poland), Witold Owczarek (Warszawa, Poland), Cindy Owen (Louisville, KY, USA), Kim Alexander Papp (Waterloo, ON, Canada), Robert J. Pariser (Norfolk, VA, USA), Adam Plotkin (Delray Beach, FL, USA), Elyse Rafal (Stonybrook, NY, USA), Tooraj Raoof (Encino, CA, USA), Ann Mazor Reed (Boca Raton, FL, USA), William C. Rees (Burke, VA, USA), Timothy Rodgers (Frisco, TX, USA), Craig Rohan (Fort Worth, TX, USA), Ned T. Rupp (North Charleston, SC, USA), Todd Schlesinger (Charleston, SC, USA), Christopher A. Smith (Cortland, NY, USA), Shondra Smith (Lake Charles, LA, USA), Martha Stewart (Covington, LA, USA), Melody Stone (St. Joseph, MO, USA), Jacek Szepietowski (Wrocław, Poland), John H. Tu (Rochester, NY, USA), Witold Urban (Skierniewice, Poland), Swapnil Vaidya (Fort Worth, TX, USA), Santa Vanaga-Besser (Mikołów, Poland), Mary Veremis-Ley (Clinton Township, MI), Kristen Ann Walker (Saskatoon, SK, Canada), Jolanta Wegłowska (Wrocław, Poland),

Jeffrey Mitchell Weinberg (Kew Gardens, NY, USA), Eduardo Weiss (Miami, FL, USA), Lara Wine Lee (Charleston, SC, USA), Marni Wiseman (Winnipeg, MB, Canada), Heather Woolery-Lloyd (Miami, FL), Paul Steven Yamauchi (Santa Monica, CA, USA), Andrea Zaenglein (Hershey, PA, USA), Marcin Zakrzewski (Katowice, Poland), Jacek Zdybski (Ostrowiec Świętokrzyski, Poland), Maria Agnieszka Zegadło-Mylik (Warszawa, Poland)

## **eMETHODS**

### **PATIENTS**

Key exclusion criteria were inability to discontinue treatment with therapies for atopic dermatitis before the baseline visit and during the trial; planned excessive exposure of treated area(s) to natural or artificial sunlight, tanning bed, or other light emitting device; previous treatment with roflumilast cream or foam; and treatment with oral roflumilast within the previous 4 weeks.

### **SAFETY ENDPOINTS**

A serious adverse event was defined as any adverse event that, in the view of either the investigator or sponsor, met at least one of the following serious criteria: fatal; life-threatening (places the patient at immediate risk of death); requires inpatient hospitalization or prolongation of existing hospitalization; results in a persistent or significant incapacity/disability; congenital anomaly/birth defect; and other important medical events that, based upon appropriate medical judgment, may jeopardize the patient and may require medical or surgical intervention to prevent one of the end points listed in the above definition.

Local tolerability at application sites was assessed by investigators (prior to study drug application in the clinic) and patients (10-15 minutes after application of the study drug) at baseline and weeks 1, 2, and 4. Investigator-rated local tolerability assessments were conducted on an eight-point scale (range 0 [no evidence of irritation] to 7 [strong reaction spreading beyond the application site]). Patient-rated local tolerability was evaluated on a four-point scale (range 0 [none] to 3 [severe]).

As depression and suicidal ideation have been reported with oral PDE4 inhibitors,<sup>1,2</sup> these adverse events were monitored by changes on the Children's Depression Inventory 2, Patient Health Questionnaire Depression Scale (including the modified version for adolescents), and Columbia-Suicide Severity Rating Scale.

### **STATISTICAL ANALYSIS**

Categorical secondary efficacy analyses were performed in the same manner as the primary end point. Continuous secondary end points were analyzed by analysis of covariance with treatment, the randomization stratification factors, and baseline value as independent variables.

Upon successful demonstration of statistical significance for Validated Investigator Global Assessment for Atopic Dermatitis (vIGA-AD) Success at week 4 in the intent-to-treat (ITT) population (defined as all randomized patients) and vIGA-AD Success at week 4 in the subset of the ITT population with vIGA-AD score of 3 (Moderate), the remaining end points were grouped into 2 secondary end point families. Secondary end point family 1 comprised a 4-point reduction on the Worst Itch-Numeric Rating Scale end point at week 4, week 2 and week 1. Secondary end point family 2 comprised a 75% reduction in the Eczema Area and Severity Index at week 4, vIGA-AD 0 (Clear)/1 (Almost Clear) at week 4, vIGA-AD Success at week 2 and week 1, vIGA-AD 0/1 at week 2 and week 1. In addition, the Fallback Method was applied. First, testing proceeded at the 0.03 level sequentially within family 1. Should all end points in family 1 be statistically significant at the 0.03 level, then the full alpha (0.03) was carried to family 2. Family 2 was then tested at  $\alpha = 0.05$  ( $0.02+0.03$ ). A  $P$  value  $> 0.03$  in family 1 would end testing within family 1, and no additional alpha would be carried over to family 2.

**eFigure 1. Statistical Testing Hierarchy**

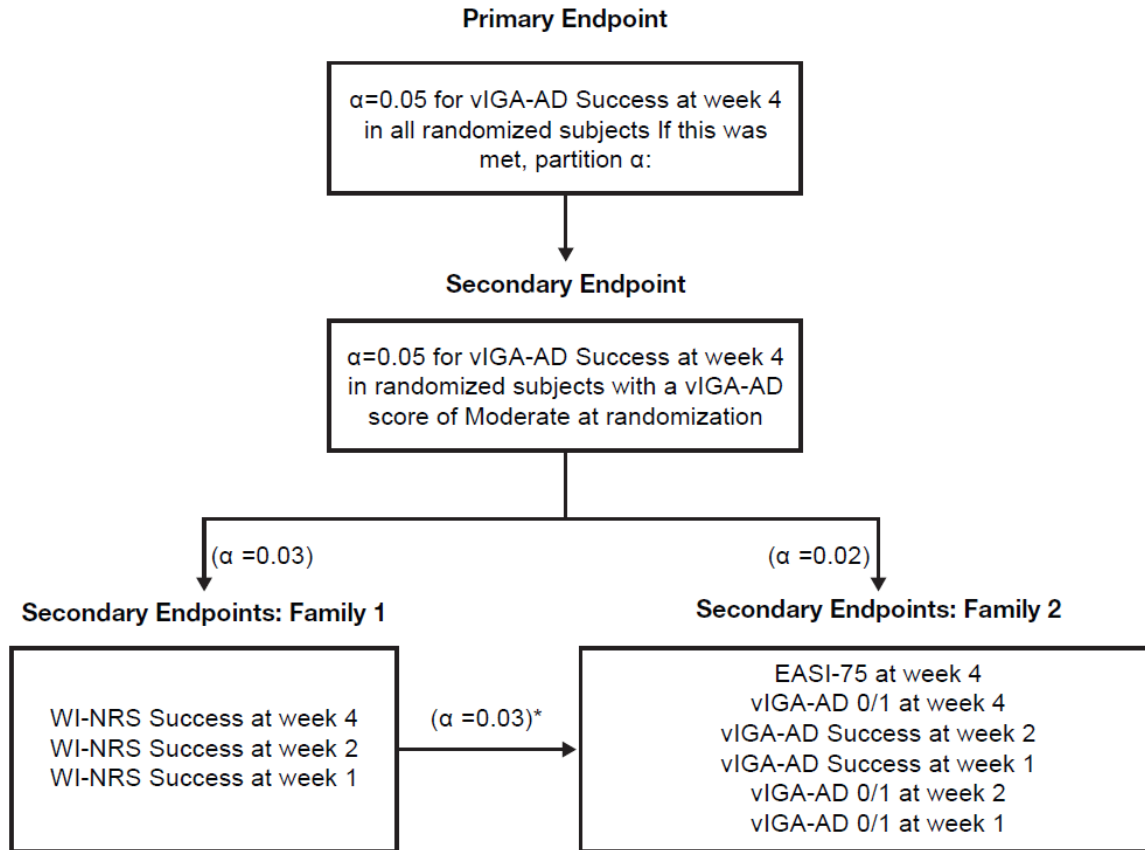

vIGA-AD was evaluated on a 5-point scale: 0 (Clear), 1 (Almost Clear), 2 (Mild), 3 (Moderate), 4 (Severe).

vIGA-AD Success = vIGA-AD score of 0 or 1 plus  $\geq 2$ -grade improvement from baseline.

WI-NRS was evaluated on an 11-point scale ranging from 0 (no itch) to 10 (worst itch imaginable).

WI-NRS Success =  $\geq 4$ -point reduction in the average weekly WI-NRS in the subset of the ITT population with baseline  $\geq 4$  and age  $\geq 12$  years.

EASI, Eczema Area and Severity Index; EASI-75,  $\geq 4$ -point reduction in EASI; ITT, Intent-to-treat; vIGA-AD, Validated Investigator Global Assessment for Atopic Dermatitis; WI-NRS, Worst Itch-Numeric Rating Scale.

\*Family 1 testing proceeded at the  $\alpha = 0.03$  level. Should all family 1 end points be statistically significant at the 0.03 level, then the full 0.03 alpha was carried to family 2. Family 2 was then tested at  $\alpha = 0.05$  (0.02 + 0.03). If anywhere in the sequential testing of family 1 there was a  $P$  value  $> 0.03$ , testing within family 1 was stopped and no additional alpha carried over to family 2.

**eFigure 2. Percentage of Patients with vIGA-AD 0/1 in INTEGUMENT-1 (A) and INTEGUMENT-2 (B)**

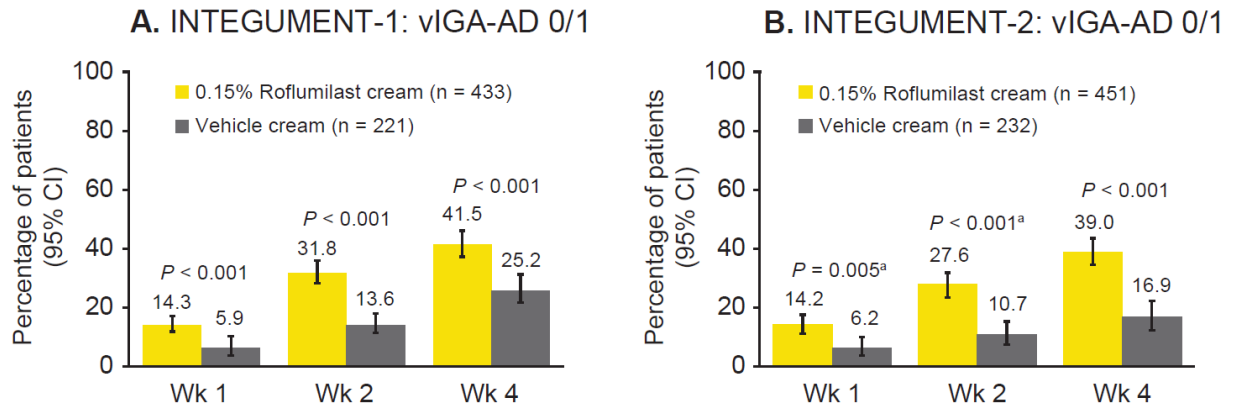

CI, Confidence interval; vIGA-AD, Validated Investigator Global Assessment for Atopic Dermatitis.  
<sup>a</sup>P values are nominal.



**eFigure 3. LS Mean Percentage CFB in EASI<sup>a</sup>**

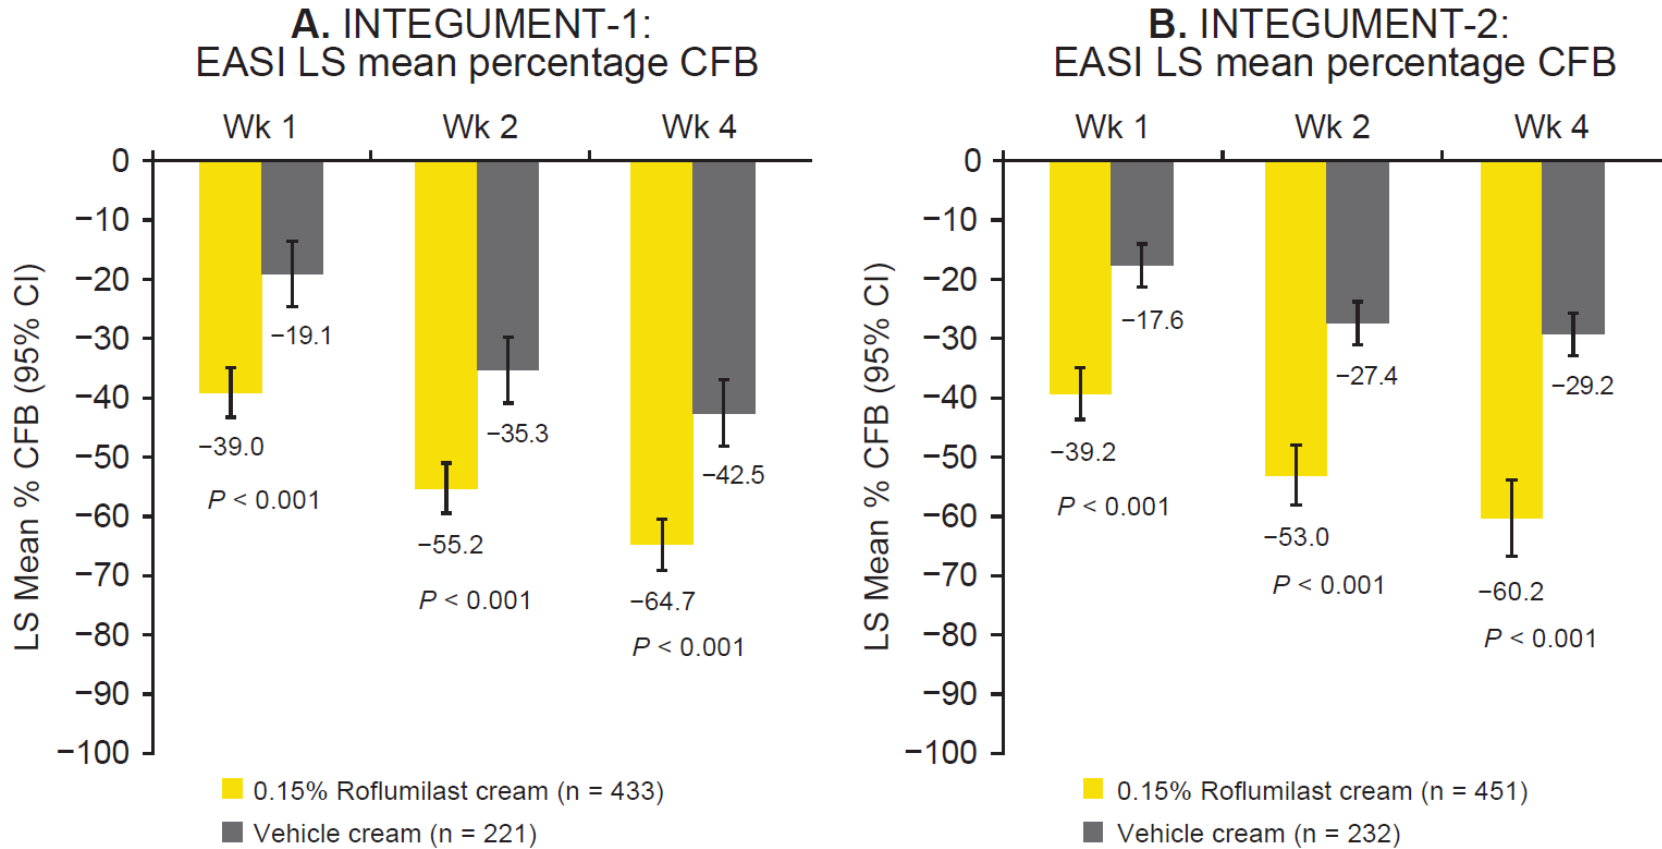

<sup>a</sup>EASI is a measurement that combines disease severity and the area affected into one score; scores range from 0 (no disease) to 72 (maximal disease);<sup>3</sup> however, due to the exclusion of the scalp, the maximum score was 70.8.  
 CFB, Change From Baseline; CI, confidence interval; EASI, Eczema Area and Severity Index; LS, least-squares.

**eFigure 4. Investigator- (A, B) and Patient-Rated (C, D) Local Tolerability**

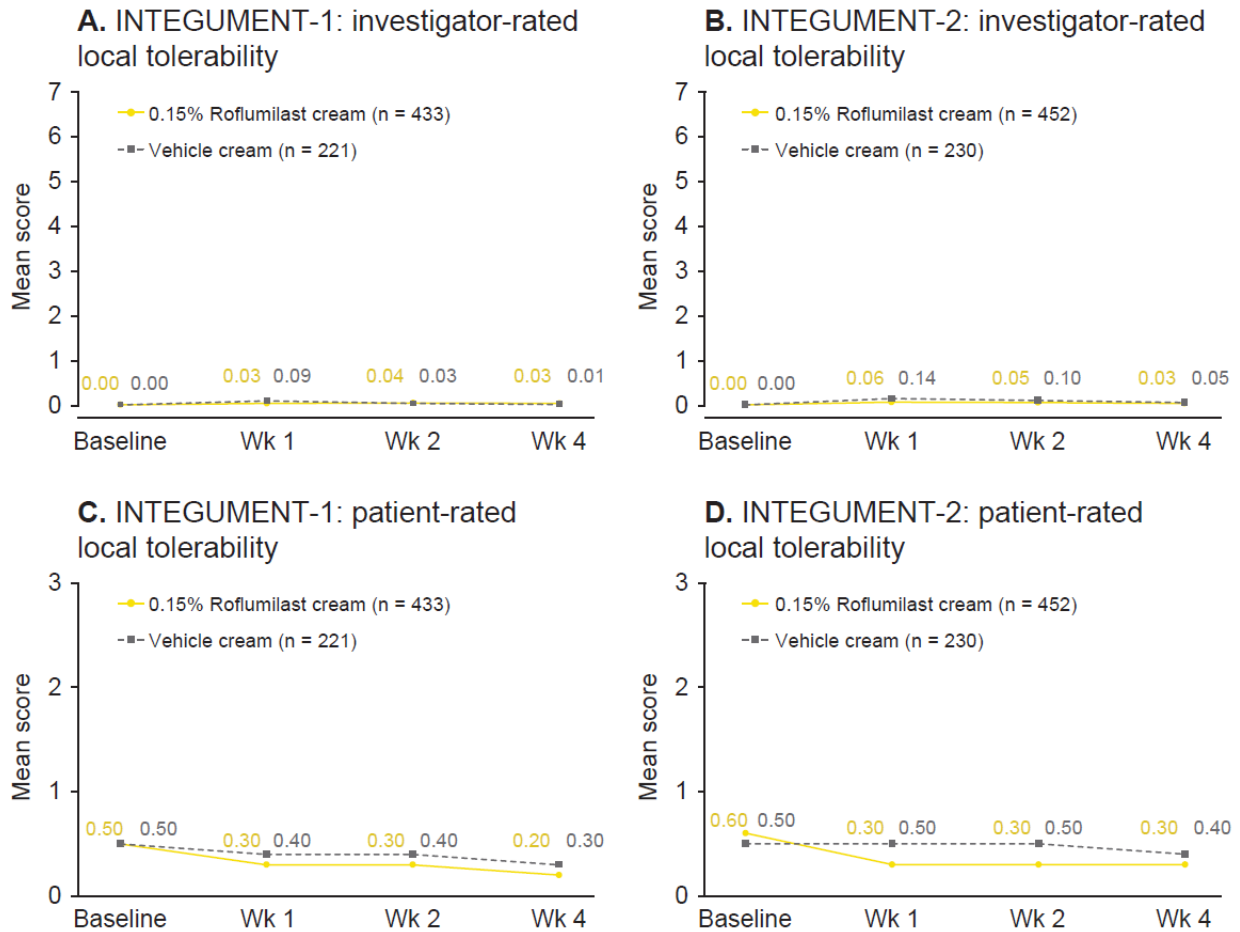

Scale for investigator-rated local tolerability (0–7): 0 = no evidence of irritation; 1 = minimal erythema, barely perceptible; 2 = definite erythema, readily visible; minimal edema or minimal papular response; 3 = erythema and papules; 4 = definite edema; 5 = erythema, edema and papules; 6 = vesicular eruption; 7 = strong reaction spreading beyond application site.  
 Scale for patient-rated local tolerability (0–3): 0 (none) = no sensation; 1 (mild) = slight warm, tingling sensation; not really bothersome; 2 (moderate) = definite warm, tingling sensation that is somewhat bothersome; 3 (severe) = hot, tingling/stinging sensation that has caused definite discomfort.

**eTable 1. vIGA-AD Scale**

| <b>Score</b>     | <b>Description</b>                                                                                                                                                                                     |
|------------------|--------------------------------------------------------------------------------------------------------------------------------------------------------------------------------------------------------|
| 0 (Clear)        | No inflammatory signs of atopic dermatitis (no erythema, no induration/papulation, no lichenification, no oozing/crusting). Postinflammatory hyperpigmentation and/or hypopigmentation may be present. |
| 1 (Almost Clear) | Barely perceptible erythema, barely perceptible induration/papulation, and/or minimal lichenification. No oozing or crusting.                                                                          |
| 2 (Mild)         | Slight but definite erythema (pink), slight but definite induration/papulation, and/or slight but definite lichenification. No oozing or crusting.                                                     |
| 3 (Moderate)     | Clearly perceptible erythema (dull red), clearly perceptible induration/papulation, and/or clearly perceptible lichenification. Oozing and crusting may be present.                                    |
| 4 (Severe)       | Marked erythema (deep or bright red), marked induration/papulation, and/or marked lichenification. Disease is widespread in extent. Oozing or crusting may be present.                                 |

Abbreviation: vIGA-AD, Validated Investigator Global Assessment for Atopic Dermatitis.

**eTable 2. Patient Demographic and Baseline Characteristics<sup>a</sup>**

| Characteristic                            | INTEGUMENT-1                      |                         | INTEGUMENT-2                      |                         |
|-------------------------------------------|-----------------------------------|-------------------------|-----------------------------------|-------------------------|
|                                           | Roflumilast Cream 0.15% (n = 433) | Vehicle Cream (n = 221) | Roflumilast Cream 0.15% (n = 451) | Vehicle Cream (n = 232) |
| Age, mean (SD), y                         | 28.1 (19.1)                       | 28.5 (18.9)             | 27.7 (19.6)                       | 26.2 (18.9)             |
| Age, No. (%) <sup>b</sup> , y             |                                   |                         |                                   |                         |
| 6–11                                      | 88 (20.3)                         | 42 (19.0)               | 126 (27.9)                        | 61 (26.3)               |
| 12–17                                     | 112 (25.9)                        | 54 (24.4)               | 80 (17.7)                         | 52 (22.4)               |
| 18–65                                     | 209 (48.3)                        | 115 (52.0)              | 225 (49.9)                        | 108 (46.6)              |
| ≥65                                       | 24 (5.5)                          | 10 (4.5)                | 20 (4.4)                          | 11 (4.7)                |
| Sex at birth, No. (%)                     |                                   |                         |                                   |                         |
| Male                                      | 196 (45.3)                        | 92 (41.6)               | 199 (44.1)                        | 89 (38.4)               |
| Female                                    | 237 (54.7)                        | 129 (58.4)              | 252 (55.9)                        | 143 (61.6)              |
| Ethnicity, No. (%)                        |                                   |                         |                                   |                         |
| Hispanic or Latino                        | 99 (22.9)                         | 56 (25.3)               | 51 (11.3)                         | 16 (6.9)                |
| Not Hispanic or Latino                    | 333 (76.9)                        | 164 (74.2)              | 397 (88.0)                        | 213 (91.8)              |
| Not reported                              | 1 (0.2)                           | 1 (0.5)                 | 3 (0.7)                           | 3 (1.3)                 |
| Race, No. (%) <sup>b</sup>                |                                   |                         |                                   |                         |
| American Indian or Alaska Native          | 2 (0.5)                           | 0 (0.0)                 | 5 (1.1)                           | 1 (0.4)                 |
| Asian                                     | 63 (14.5)                         | 32 (14.5)               | 51 (11.3)                         | 30 (12.9)               |
| Black or African American                 | 80 (18.5)                         | 46 (20.8)               | 96 (21.3)                         | 50 (21.6)               |
| Native Hawaiian or other Pacific Islander | 1 (0.2)                           | 0 (0.0)                 | 0 (0.0)                           | 0 (0.0)                 |
| White                                     | 261 (60.3)                        | 129 (58.4)              | 268 (59.4)                        | 138 (59.5)              |
| Multiple                                  | 12 (2.8)                          | 6 (2.7)                 | 12 (2.7)                          | 8 (3.4)                 |

|                                                                                    |                    |                  |                     |                     |
|------------------------------------------------------------------------------------|--------------------|------------------|---------------------|---------------------|
| Other <sup>c</sup>                                                                 | 14 (3.2)           | 8 (3.6)          | 19 (4.2)            | 5 (2.2)             |
| Inadequate response, intolerance, or contraindication to prior medication, No. (%) |                    |                  |                     |                     |
| Topical corticosteroids                                                            | 285 (65.8)         | 136 (61.5)       | 260 (57.6)          | 132 (56.9)          |
| Topical calcineurin inhibitors                                                     | 77 (17.8)          | 35 (15.8)        | 84 (18.6)           | 46 (19.8)           |
| Crisaborole                                                                        | 23 (5.3)           | 14 (6.3)         | 45 (10.0)           | 16 (6.9)            |
| Fitzpatrick skin type at screening <sup>d</sup> , No. (%)                          |                    |                  |                     |                     |
| I–III                                                                              | 233 (53.8)         | 112 (50.7)       | 248 (55.0)          | 126 (54.3)          |
| IV–VI                                                                              | 200 (46.2)         | 109 (49.3)       | 203 (45.0)          | 106 (45.7)          |
| Baseline vIGA-AD <sup>e</sup> , No. (%)                                            |                    |                  |                     |                     |
| 2 (Mild)                                                                           | 103 (23.8)         | 59 (26.7)        | 108 (23.9)          | 53 (22.8)           |
| 3 (Moderate)                                                                       | 330 (76.2)         | 162 (73.3)       | 343 (76.1)          | 179 (77.2)          |
| EASI <sup>f</sup>                                                                  |                    |                  |                     |                     |
| Mean (SD)                                                                          | 9.9 (5.3)          | 9.8 (5.1)        | 10.3 (6.1)          | 10.2 (5.3)          |
| Median (Range)                                                                     | 8.2 (4.4, 47.4)    | 8.2 (4.2, 37.9)  | 8.5 (4.9, 52.5)     | 8.4 (3.4, 31.2)     |
| BSA                                                                                |                    |                  |                     |                     |
| Mean (SD)                                                                          | 13.4 (11.9)        | 12.9 (11.1)      | 13.7 (11.6)         | 14.9 (11.3)         |
| Median (Range)                                                                     | 9.5<br>(3.0, 87.0) | 9<br>(3.0, 86.0) | 10.0<br>(3.0, 88.0) | 11.0<br>(3.0, 63.0) |
| Areas involved, No. (%)                                                            |                    |                  |                     |                     |
| Facial                                                                             | 181 (41.8)         | 98 (44.3)        | 189 (41.9)          | 99 (42.7)           |
| Eyelid                                                                             | 84 (19.4)          | 43 (19.5)        | 94 (20.8)           | 56 (24.1)           |
| WI-NRS <sup>g</sup> — no.                                                          |                    |                  |                     |                     |
| Mean (SD)                                                                          | 423                | 217              | 435                 | 224                 |
| Median (Range)                                                                     | 5.9 (2.1)          | 5.9 (2.4)        | 6.2 (2.2)           | 5.9 (2.1)           |
| Median (Range)                                                                     | 6.1 (0, 10)        | 6.0 (0, 10)      | 6.4 (0, 10)         | 6.1 (0, 10)         |
| Average weekly baseline WI-NRS ≥ — no. (%)                                         |                    |                  |                     |                     |
|                                                                                    | 350 (80.8)         | 168 (76.0)       | 359 (79.6)          | 181 (78.0)          |

Abbreviations: BSA, body surface area; EASI, Eczema Area and Severity Index; SD, standard deviation; vIGA-AD, Validated Investigator Global Assessment for Atopic Dermatitis; WI-NRS, Worst Itch-Numeric Rating Scale.

<sup>a</sup>Patient demographics and baseline characteristics are for the intent-to-treat population, defined as all patients who were randomized to treatment.

<sup>b</sup>Percentages may not add up to 100% due to rounding.

<sup>c</sup>The other category includes patients who chose to describe their race rather than select one of the provided options as well as patients who did not report their race.

<sup>d</sup>Fitzpatrick Skin Type at screening: I. Always burns easily; never tans. II. Always burns easily; tans minimally. III. Burns moderately; tans gradually. IV. Burns minimally; always tans well. V. Rarely burns; tans profusely. VI. Never burns; deeply pigmented.

<sup>e</sup>The Validated Investigator Global Assessment for Atopic Dermatitis is a five-point scale for assessing inflammatory signs of atopic dermatitis.

<sup>f</sup>EASI is a measurement that combines disease severity and the area affected into one score; scores range from 0 (no disease) to 72 (maximal disease); however, due to the exclusion of the scalp, the maximum score was 70.8.

<sup>g</sup>WI-NRS score is a patient-reported assessment of itch in the preceding 24 hours; scores range from 0 (no itch) to 10 (worst itch imaginable).

**eTable 3. vIGA-AD Success at Week 4**

| Baseline Characteristic, % | INTEGUMENT-1                      |                         | INTEGUMENT-2                      |                         |
|----------------------------|-----------------------------------|-------------------------|-----------------------------------|-------------------------|
|                            | Roflumilast Cream 0.15% (n = 433) | Vehicle Cream (n = 221) | Roflumilast Cream 0.15% (n = 451) | Vehicle Cream (n = 232) |
| 6–11 y of age<br>%         | n = 88<br>26.4                    | n = 42<br>10.3          | n = 126<br>26.7                   | n = 61<br>7.0           |
| 12–17 y of age<br>%        | n = 113<br>32.7                   | n = 54<br>5.6           | n = 80<br>27.7                    | n = 52<br>15.5          |
| ≥18 y of age<br>%          | n = 233<br>33.9                   | n = 125<br>21.1         | n = 245<br>30.5                   | n = 119<br>13.0         |
| vIGA-AD of 3<br>%          | n = 328<br>35.0 <sup>a</sup>      | n = 164<br>17.5         | n = 342<br>32.9 <sup>b</sup>      | n = 179<br>13.1         |

vIGA-AD Success = vIGA-AD score of 0 (Clear) or 1 (Almost Clear) plus ≥2-grade improvement from baseline.

Abbreviations: ITT, intent-to-treat; vIGA-AD, Validated Global Assessment for Atopic Dermatitis; vIGA-AD Success.

<sup>a</sup>Difference, 17.4%;  $P < 0.001$ .

<sup>b</sup>Difference 19.1%,  $P < 0.001$ .

## References

1. Otezla (apremilast) tablets prescribing information. Thousand Oaks, CA: Amgen; 2020.
2. Daliresp (roflumilast) tablets prescribing information. Wilmington, DE: AstraZeneca Pharmaceuticals; 2020.
3. Hanifin JM, Thurston M, Omoto M, Cherill R, Tofte SJ, Graeber M. The eczema area and severity index (EASI): assessment of reliability in atopic dermatitis. EASI Evaluator Group. *Exp Dermatol*. 2001;10:11-18.
