# Supplementary material for: Roflumilast Cream, 0.15%, for Atopic Dermatitis in Adults and Children: INTEGUMENT-1 and INTEGUMENT-2 Randomized Clinical Trials
Source: PubMed Central journal article supplement — JAMA Dermatol. 2024 Sep 18;160(11):1161–70. doi: 10.1001/jamadermatol.2024.3121 (PMC11411450; doi:10.1001/jamadermatol.2024.3121), 2024-09-18
Supplement: jamadermatol-e243121-s003.pdf [file jamadermatol-e243121-s003.pdf]

## Data Sharing Statement

Simpson. Roflumilast Cream, 0.15%, for Atopic Dermatitis in Adults and Children. *JAMA Dermatol.* Published September 18, 2024. doi:10.1001/jamadermatol.2024.3121

### Data

**Data available:** Yes

**Data types:** Other (please specify)

**Additional Information:** Data collected for these studies will be made available to others. Proposals for data requests will be reviewed and considered for sharing following approval of the indication. Information about when data availability will begin and end will be provided following approval of the indication.

**How to access data:** Data collected for these studies will be made available to others. Proposals for data requests will be reviewed and considered for sharing following approval of the indication. Information about when data availability will begin and end will be provided following approval of the indication.

**When available:** beginning date: 07-07-2024

### Supporting Documents

**Document types:** None

### Additional Information

**Who can access the data:** Data collected for these studies will be made available to others. Proposals for data requests will be reviewed and considered for sharing following approval of the indication. Information about when data availability will begin and end will be provided following approval of the indication.

**Types of analyses:** Data collected for these studies will be made available to others. Proposals for data requests will be reviewed and considered for sharing following approval of the indication. Information about when data availability will begin and end will be provided following approval of the indication.

**Mechanisms of data availability:** Data collected for these studies will be made available to others. Proposals for data requests will be reviewed and considered for sharing following approval of the indication. Information about when data availability will begin and end will be provided following approval of the indication.
